# Supplementary material for: Genome-wide identification and characterization of the KCS gene family in sorghum ( Sorghum bicolor (L.) Moench)
Source: PeerJ journal article supplement (doi:10.7717/peerj.14156), 2022-10-07
Supplement: Fig._S1_Multi-sequence_alignment_and_domain_analysis_of_the_AtKCS_and_SbKCS_Proteins.pdf [file Fig._S1_Multi-sequence_alignment_and_domain_analysis_of_the_AtKCS_and_SbKCS_Proteins.pdf]

```

*      20      *      40      *      60      *      80
AtKCS1  IEMDRERLTAEMAFRDSS-----SAVIRIRRRRLPDLTTSVKLKYVGLKLNHCNVTLFFLIILPLTGTVLVQLTGLTFD : 74
AtKCS2  --MNEHQSDHDMN---TIHVTN-----KCLPNFLLSVRLKYVGLGYHYLISNAIILLP-VGLLAAT-SSSFSLTD- : 65
AtKCS3  -----MDLVLMLLSLLVS----- : 13
AtKCS4  -----MDGAGESGGDGSVGVQIRQTRMLPDFLQSVNLYVGLGYHYLISNLLTCLFLPLAVVISVEASQMNPPD : 69
AtKCS5  -----MSDFSSSVKLYVGLGYQYLNNFLTLLLPVATVAIELLRMGPEE : 47
AtKCS6  -----MPQAMPPEFSSSVKLYVGLGYQYLNHFLSFLLEPIMAVIVAVELLRMGPEE : 52
AtKCS7  -----MESSFHFINE-----ALLITQFTTFHFQFLVAS-- : 28
AtKCS8  -----MKNLKMVF-----FKILFISLMAGLAMKSGSKINVED : 31
AtKCS9  -----MEAAEPGGSVQIRTEENERRKLPNFQSVNMYVGLGYHYLITHLFKLCLVPLMAVLTEISRLTDD : 69
AtKCS10 --MGRSNEQDLLSTEIVNRPNAGSPTFSVVRVRRRLPDFLQSVNLYVGLGYHYLINHAYLATIPVLVLFSAEVSLSREE : 79
AtKCS11 --MDVEQKKP-----LIESSD-----RNLPDFKKSVKLYVGLGYHYLITHGLFSLPVLVIAAQ-ISTFSVTD- : 61
AtKCS12 -----MDLFLFFSLLLS----- : 13
AtKCS13 -----MFIAMADFKILL-----ILILISLFEFLDHLHFFHDDFFS : 34
AtKCS14 -----MFIAMADFKILL-----ILILISLFEFLDHLHFFHDDFFS : 34
AtKCS15 -----MEKEATKMNVP-KGS-----PDFLG-YNLRVYVGLGYIYLSLSFCFFLPPLLLLFIVSRFLP--- : 57
AtKCS16 -----MDYPMKKVKIIFNYLMAHREFKCLFLPMVAIAVEASRLSTQD : 42
AtKCS17 -----MDAN--GGPVQIRTON-----YVGLGYHYLITHFVKLMFLPLMAVLFMNVLSLSLN- : 49
AtKCS18 -----MTSVNKKLYRYVLTNFFNLCLFLPTAFLAGKASRLTIND : 40
AtKCS19 -----MEFLSLSLLLSL----- : 14
AtKCS20 --MSHNQNG-PHRV---PVHVNAEPNPNPNLNFLLSVRLKYVGLGYHYLISNAIILLPLLAATIAN-LSSFTIND- : 72
AtKCS21 -----MNQTIHRVSP-----ISMSISELTTLLSSGVSVF- : 29
SbKCS1  -----MEIMTLLTLPLLAC----- : 14
SbKCS2  ----- : -
SbKCS3  AVMERERLTAELDLAVV-AAEPS-SFVVKIRRRLPDFARSVNLKYVRLGLRSGGIPATWVPLALAPP---LLAAAVYSLV : 75
SbKCS4  -----MELPLLTLWLLAH----- : 14
SbKCS5  AVMERERLTAEMAFRGADGGEPAPSIKIRRRLPDFARNIKLYVGLGIRHGGSP--VLPMLCVP---ATAAAAYSFV : 75
SbKCS6  -----MPTG---GVFSGSVNLYVGLGYQYLNHFLTLLLPVMAATALELARGPEE : 50
SbKCS7  --MAR-EEQALLSTEIMNRDAGSPTFSVVRVRRRLPDFLQSVNLYVGLGYHYLISHGYLATIPVIVLVCGEVGSLSRDE : 78
SbKCS8  --MANQQRHRSIAGMD-----RELFRTRQAALNBARLLYHRLVSRLLLAVTIVVAAQVLPVPPSSAHA- : 62
SbKCS9  -----MLSSKAAAAAAASRLTLPVIVLPLVVS----- : 29
SbKCS10 -----MDIAHRDYLVQVTHHTILGVALLCVLAELEFIFAFRCRTALYLPV : 43
SbKCS11 -----MHRKTKMAKLSLKTWYQLFVDFNFIVAVFVAALRRRWPVS-VDDL : 46
SbKCS12 -----MNTPLHVKFLKTYRLLVNNFVVALAAVAVVPTSPH---EEV : 41
SbKCS13 --MENPAPPTDPAATGAPSSSFS-----RQLPDFQSVRLKYVGLGYHYLISHGLLTPMLVAVH-LSTLSPRD : 69
SbKCS14 --MSAAHQPEPTAFA---AAASCGGGDSTIKNARHRT-STLKQCYH---LAISNALLAP-AVAYASHRFSHHTASD- : 68
SbKCS15 --MSKSETNERS-----STIQSAGHRICSVIKLYQHLMLAVSYALFLAPLILATLVHLHRSHTSADD : 62
SbKCS16 ----- : -
SbKCS17 -----MLSHLGMSS-----VAAAAMLQRAWTFSS-YGII : 27
SbKCS18 -----MNGGAAPASAAAAAATPPHRRLPDFLQSVNLYVGLGYHYLITHLTLMPLMAVILLEAGRTDPPD : 69
SbKCS19 --MADEPRTT-----AAATPS-----SRMPDFKQSVKLYVGLGYHLLISHGLLAPLPGLVAAH-LSTFTLRD- : 61
SbKCS20 -----MSSPPLFGNGKGLKAVCRRVVNIIVVTPATAALVAMARFGPEEQ : 47
SbKCS21 -----MALS---PSQRLLSLYQIVVNVIVAVSITTAVILVAAQFG-FSEH : 43
SbKCS22 -----MSSS---HICKYLLKTVFAKIVDNFTVAVPATAAVIVAATTSRDEF : 44
SbKCS23 -----MNSL---LSLKRKYVQLVNNFTVAVLFAAILLRKGAQLG-LAEI : 43
SbKCS24 -----MIAMILEVTTQLCQDRLL : 18
SbKCS25 --METSAPPNAAAP---PAQQPR-----RRLPDFQSVRLKYVGLGYHYLISHGLLSPMLMALVAVQ-LSTVSPRD- : 65

```

```

*      100      *      120      *      140      *      160
AtKCS1  TFSELVSQLDTRATLTCVLFVLSVLTLYVANRSPKPVYLVDSCYKPEDEKRSVDSFLLTMTTEENGSTFDDTVOEQORIS : 154
AtKCS2  -LTLNLYNKHFLHSSSTLFAALLIFLTYFTTRRRRFLLDLDFACYKEDSSLICRETFMRSQRVGFITEDNLAEQOKIIL : 144
AtKCS3  -----YLIFKIWKRLDSKRDQ-NCYILDYQCHKRESDDRMVTQFSGDILRNKHLRLE-KLLHAI : 73
AtKCS4  LKQLWIHLQYNLVSIIICSAIIVFLGLTYVVMTRPRPVYLVDSCYLPDPHLKAPYARVEHSRLTGDFDSSALEPQRKIL : 149
AtKCS5  ILSVNLNLSHFELLHILCSSFLIFVSTVYFMSKPRTPVYLVDSCYKPPVTCRVPFSSFEHSRLILKDNPKSVEPQRIL : 127
AtKCS6  IINWVNSLQPDFLVQLCSSFVIFSTVYFMSKPRTPVYLVDSCYKPPVTCRVPFATFMEHSRLILKDKPKSVEPQRIL : 132
AtKCS7  -----ACVLIAVFGYFFKPRCIYLLIDSCYQPDFLRAVPSNFEHSLTISGVDFQESLDLQOKIIL : 90
AtKCS8  LQKFSLHTQNNLQISLLELFLVVFVWILYMLTRPKPVYLVDSCYLPESHKLVSIQTLGHARRAREAGMCWVDPQEKIL : 111
AtKCS9  LYQIWLHLQYNLVAIFLSALAFVSTVYIMSRRSPVYLVDSCYLPESLQVKYQKFMHSHKLIEDFNESSELEPQRIL : 149
AtKCS10 IWKKLW---DYDLATVIGFPGVFLTACVYFMSRPRSYYLIDFACYKPSDEHKVTKKEFTELARKSGKFDEETLGGKRIIL : 157
AtKCS11 -LRSWLQYNLISVVCMSLVLFLMTYFMTTRPRPVYLVDSCYKREDESRLCTKKEFMDRSKLTGTSFTEENLEPQRIL : 140
AtKCS12 -----YLFPKIWKLLDSKQDK-DCYILDYQCHKRETDDRMVTQFSGEIVYRNQNLGLTE-KLLHAI : 73
AtKCS13 PFPVKIG-----LLLISIFFYASTTRSKPVYLVDSCYKQPTDSCKISSETFFNMAKGAQLYDETOQMTRIIL : 103
AtKCS14 PFPVKIG-----LLLISIFFYASTTRSKPVYLVDSCYKQPTDSCKISSETFFNMAKGAQLYDETOQMTRIIL : 103
AtKCS15 -----ILAFPLSTFFLILTYHYLTPSSVLDLDFSCYRPPDHLKIKSDFTELAMKSGNFNETALELQKRVL : 123
AtKCS16 LQNFYLYLQNNHSLTMFFLYLALGSTYLMTRPKPVYLVDSCYLPESHKASTQRIQHVRLVREAG-AWMDCEKIL : 121
AtKCS17 ---HLQLYNSTGFIVITLAVGSIIVFMSRPRSYYLIDYSCYLPSSQKVSQKFMNNSLIQDFSETSELEPQRIL : 125
AtKCS18 LHNFLSYLQHNLIIVTLLFAFTVFLVYIYVTRPNPVYLVDSCYLPESHKVSQKVDIFQYIRKADTSSDELKRIQ : 120
AtKCS19 -----LFFVYIFKFKRRNRQNCMMHYKCYKGMEEKLDTETCAKVVQRNKNLGLLE-RELLRTM : 75
AtKCS20 -LSLLYNLRFHFLSATLATALISLSTAYFTTRRRRFLLDLDFSCYKREDPSLICRETFMRSQRVGFITEDNLAEQOKIIL : 151
AtKCS21 -----EIFAGLLVHLIYQIRTRVYVYLLDFTCYRAPDSNRVPMSTLETIYLDKLDQESLDEQARIL : 94
SbKCS1  -----LAAMLARLLVARQRR-RCYLLDYVQYKATDDRKLPTDLCGEIQRNQLLGLLE-KLLHAI : 77
SbKCS2  ---KEMEVGLSPAAVAVACAAAAAAAYAVSRPRPVYLVDLSCYVAGAAHEASRAKTAHFGRGCRGFSDESVAEQKRM : 74
SbKCS3  GADKLY--SLDLLTCVAWLAALAVLLTYVFKRPRPVYLVDACYREADEHAISKEGFLDMTESTGWFNAEALDQTKIT : 153
SbKCS4  -----AMAYLAWTAAARRRQS-RCYLLDYVCHKRDRDLKSTETAGDVIQRNARLGLTD-RELLRVV : 74
SbKCS5  RLDVVIY-SIDLLTCVAWLGATALLTYVYFKRPRPVYLVDACYKPEEQKISKSAFEMTESTGWFNAEALDQTKIT : 154
SbKCS6  LLSLWRSLELDLVLHILCSVFLVFGTIVYVMSRPRPVYLVDACYKPPASCRVPFATFMEHTRLISDDD-KSVREQTRIL : 129
SbKCS7  LWRKVGATYDLATVLAFLAVLAFTISVYIMSRRPVYLIDFACYKPADELKVSKEFIDLARKSGKFDEDSLAEQSRIL : 158
SbKCS8  -ARTLLRAARADAGLVAALAAACACAYAAALRPRPVYLVDLAARREGPAHRATRAESVRFHALAGRFTDESVAEQTRM : 141
SbKCS9  -----ALVFLGLVRLRLRRQRPVYLIDYSCYLPDAERQVNLEVECYFGLKCRYSDDI-DEMRLVY : 90
SbKCS10 -----MAALLFNRRFRRAAAATDDEGLVDLDFSCYKPPRRLRPLVAGLEHLRLIGCFDDGSEVEMAKVI : 109
SbKCS11 AGSLRAV-PPVRIITAVILT--AGVAQERRRRPRDYLVEYGCRRPKCFRAPPATCLEHAFYLYPQVDPVETSIIRLL : 123
SbKCS12 LALVREI-RPVHCLLVLLLA--AAAVAKWRMGRPKDYLVVEYGCRRPKCFRAPPATCLEHAFYLYPQVDPVETSIIRLL : 118
SbKCS13 -VADLWALRNLNLSVACSTLVLVFLGTYYLFTTRPRPVYLVDACYKREPERCTRDTEMRCSRLTGCFDGDSEHQRKIL : 148
SbKCS14 ---VTSFASNPFPVAVSLVLAVALTAYLMRRPRPVYLIDFACYKFGAGHVVTRETFMRQSEAAQVFTDMDHAEQRKIL : 145
SbKCS15 DLIVSARLANPLPFTV--VVVAAMATAYLMRRPRPVYLIDFACYKREGAEHAVTRETMRVLVVGYGFSDDSLAEQRKIL : 140
SbKCS16 -----EPRHRVPFATALHEHGRMLNDLIDEELESMVRILH : 33
SbKCS17 SGLL---PIHVLMLVVLV--AGLAMWRHRRPRDYLVDYGCRRPGDPCYRVPFAMALEHGRMLNDLIDEELESMVRILH : 101
SbKCS18 LRQLWLHLQYNLVSVLVAVLFGATYYLFTTRPRPVYLVDACYKREPAHLQVRFEEFMRHSLCG-FSEDAEQRKIL : 148
SbKCS19 -LADLWQLQYNLVSVLVCTTVLVVATYALTRPRPVYLVDACYKREDDERKCSRARFNCTESLGTFTPENLEQRRIIL : 140
SbKCS20 AGQFREA-RPVHVFVLAFFV--AAATVYLMRPRPVYLIDYACRPTASNCRVPFSTLEHAKQV-PVLDERHRRMTKLL : 123
SbKCS21 IFFLHAL-RPIYLLTALLP--AAFTTYLVNRSYDYLVDYACREKINCRVPLAAFEKHMMLHRLFLDDRWHLETRMI : 120
SbKCS22 TTLHSHV-SNTDVLISGLL--GTAAVAIMRRPRPVYLIDYACREPHNTRVPAAAFVEHVQHV-SQLTERKRLTRILY : 120
SbKCS23 LIWLHAV-THAHLLLLFLLSIGLILYFMYTSHHYYLVDYACREHRTANCRVMSASETEHLHMM-PSLNDNTOQMTRIIL : 121
SbKCS24 TLSTNNL-PIIHILLVFLLI--TVTVRYLIRHRRPVYLVEYTCYKEDSKYRVAPASMEYFHLLA-NLLDDDSLSLSNLY : 94
SbKCS25 -LADLWELRFNLLSVVACSTLVLVFLSTVYFLTRPRPVYLIDFACYKREPERKCTROTVMHCSNLTGTFDDNLEPQRIL : 144

```

\*            180            \*            200            \*            220            \*            240

```

AtKCS1  NRASGLGDDTYLPPRGITSTPPKLNMEARAEAEAVMFGALDLSLEKTKGKAEVGLIIVNCSLENPTPSLSAMIVNHYKMR 234
AtKCS2  ERSGLGQKTYVPEALLRVPPNCSSEARAEAEAVMFGALDLSLEKTKGKAEVGLIIVNCSLENPTPSLSAMIVNHYKMR 224
AtKCS3  VSSGIGCEQTYAPRLVFEFGQP-TLDGLSEMEEFYIDTTEKVLKRNKSPSEITDILVNVVSLNSPTPSLSARITINHYKMR 152
AtKCS4  ERSGLGDDTYVPEAMHYVPPRISMAAAEAEAEAVMFGALDLSLEKTKGKAEVGLIIVNCSLENPTPSLSAMIVNHYKMR 229
AtKCS5  ERSGLGDETCPPAIHYIPTPTMESARAEAEAVMFGALDLSLEKTKGKAEVGLIIVNCSLENPTPSLSAMIVNHYKMR 217
AtKCS6  ERSGLGDETCPPAIHYIPTPTMESARAEAEAVMFGALDLSLEKTKGKAEVGLIIVNCSLENPTPSLSAMIVNHYKMR 202
AtKCS7  ERSGLSDASVPEATVHIEIPNNAISAAEAEAEAVMFGALDLSLEKTKGKAEVGLIIVNCSLENPTPSLSAMIVNHYKMR 170
AtKCS8  ERSGLGQETVYPEGLQCFPELQOQMGASRKEETEVIKALDLSLEKTKGKAEVGLIIVNCSLENPTPSLSAMIVNHYKMR 191
AtKCS9  ERSGLGDETYLPEALHCIPPTMMAAREAEAEAVMFGALDLSLEKTKGKAEVGLIIVNCSLENPTPSLSAMIVNHYKMR 229
AtKCS10  QASGIGDETYVPRSSISSNITMTEKGEAEAEAVMFGALDLSLEKTKGKAEVGLIIVNCSLENPTPSLSAMIVNHYKMR 237
AtKCS11  QRSGLGSESYLPEAVLNVPEPNCMEARAEAEAVMFGALDLSLEKTKGKAEVGLIIVNCSLENPTPSLSAMIVNHYKMR 220
AtKCS12  VSSGIGCEQTYAPRLVFEFGQP-TLDGLSEMEEFYVDSICKLERNQISPKDIDILVNVVSLNSPTPSLSARITINHYKMR 152
AtKCS13  NRSGLGDDTYSPRCMLTSPPTPSMYEARAEAEAVMFGALDLSLEKTKGKAEVGLIIVNCSLENPTPSLSAMIVNHYKMR 183
AtKCS14  NRSGLGDDTYSPRCMLTSPPTPSMYEARAEAEAVMFGALDLSLEKTKGKAEVGLIIVNCSLENPTPSLSAMIVNHYKMR 183
AtKCS15  DQSGIGDESYMPRVVFKPHRVNLRDGEAEAEAVMFGALDLSLEKTKGKAEVGLIIVNCSLENPTPSLSAMIVNHYKMR 203
AtKCS16  ERSGLGQETVYPEGLQCFPELQOQMGASRKEETEVIKALDLSLEKTKGKAEVGLIIVNCSLENPTPSLSAMIVNHYKMR 201
AtKCS17  IERSGLGDETYLPEALHCIPPTMMAAREAEAEAVMFGALDLSLEKTKGKAEVGLIIVNCSLENPTPSLSAMIVNHYKMR 205
AtKCS18  ERSGLGDETYLPEALHCIPPTMMAAREAEAEAVMFGALDLSLEKTKGKAEVGLIIVNCSLENPTPSLSAMIVNHYKMR 200
AtKCS19  ASSGIGDETYLPEALHCIPPTMMAAREAEAEAVMFGALDLSLEKTKGKAEVGLIIVNCSLENPTPSLSAMIVNHYKMR 154
AtKCS20  ERSGLGQKTYVPEALLRVPPNCSSEARAEAEAVMFGALDLSLEKTKGKAEVGLIIVNCSLENPTPSLSAMIVNHYKMR 231
AtKCS21  ERSGLWNTSIFPRSLMIEILKKSIVSVEITFMTHLTSVEDLRLKKNLSPRSIDILVNCVHSPSPSLSAMIVNHYKMR 174
SbKCS1  ANSGTGEETVYSPRNMIIEGAPDRREGMEEMDETFHVLDELFAASARPAVDVIVNCSLENPTPSLSARVVRVYGLR 154
SbKCS2  ERSGLGDRTHFPASLLSVVDMCARTAEESHAIVIFGVDDLLRRAAVAPAEVGLIIVNCSLENPTPSLSAMIVNHYKMR 157
SbKCS3  ERSGLGDRTHFPASLLSVVDMCARTAEESHAIVIFGVDDLLRRAAVAPAEVGLIIVNCSLENPTPSLSAMIVNHYKMR 233
SbKCS4  VRSGLGDETYAPRILEGDDP-TLKDSLEEMDAEFAVAELFA--VSPGDDVIVNCSLENPTPSLSARVVRVYGLR 151
SbKCS5  NRSALGDETYLPPGVQARPPRLNMAEAEAEAEAVMFGALDLSLEKTKGKAEVGLIIVNCSLENPTPSLSAMIVNHYKMR 234
SbKCS6  ERSGLGDDTYSPRCMLTSPPTPSMYEARAEAEAVMFGALDLSLEKTKGKAEVGLIIVNCSLENPTPSLSAMIVNHYKMR 209
SbKCS7  AKSGLGDESYMPRCVPEPANCATVKEGSAEAEAEAVMFGALDLSLEKTKGKAEVGLIIVNCSLENPTPSLSAMIVNHYKMR 238
SbKCS8  ERSAGVDAITHFPASLLSVVDMCARTAEESHAIVIFGVDDLLRRAAVAPAEVGLIIVNCSLENPTPSLSAMIVNHYKMR 221
SbKCS9  SRSGLGQETVYPEGLQCFPELQOQMGASRKEETEVIKALDLSLEKTKGKAEVGLIIVNCSLENPTPSLSAMIVNHYKMR 168
SbKCS10  EASGMCNETVYPPSLHYIPA-ATHADAVQEARAFPTLDDFAKGVPPSRVGLIIVNCSLENPTPSLSAMIVNHYKMR 188
SbKCS11  ERSGLGDETYLPEALHCIPPTMMAAREAEAEAVMFGALDLSLEKTKGKAEVGLIIVNCSLENPTPSLSAMIVNHYKMR 202
SbKCS12  ERSGLGDETYLPEALHCIPPTMMAAREAEAEAVMFGALDLSLEKTKGKAEVGLIIVNCSLENPTPSLSAMIVNHYKMR 197
SbKCS13  ERSGLGDETYLPEALHCIPPTMMAAREAEAEAVMFGALDLSLEKTKGKAEVGLIIVNCSLENPTPSLSAMIVNHYKMR 222
SbKCS14  ERSGLGQCTFFPAVLSNPPNCPMAEAEAEAEAVMFGALDLSLEKTKGKAEVGLIIVNCSLENPTPSLSAMIVNHYKMR 225
SbKCS15  ERSGLGQCTFFPAVLSNPPNCPMAEAEAEAEAVMFGALDLSLEKTKGKAEVGLIIVNCSLENPTPSLSAMIVNHYKMR 220
SbKCS16  OKSALGDETSVDFSRFCIP-DRGTEASCEAEELVIFSAVDFKAFARQVNEEDIDAVIACSFVTLVIVNCSLENPTPSLSAMIVNHYKMR 112
SbKCS17  ERSALGDETSVDFSRFCIP-DRGTEASCEAEELVIFSAVDFKAFARQVNEEDIDAVIACSFVTLVIVNCSLENPTPSLSAMIVNHYKMR 180
SbKCS18  ERSGLSEETVYPEAMHAIIPQPTMANARAEAEAEAVMFGALDLSLEKTKGKAEVGLIIVNCSLENPTPSLSAMIVNHYKMR 228
SbKCS19  ERSGLGDETYLPEALHCIPPTMMAAREAEAEAVMFGALDLSLEKTKGKAEVGLIIVNCSLENPTPSLSAMIVNHYKMR 220
SbKCS20  ERSGLGDETYLPEALHCIPPTMMAAREAEAEAVMFGALDLSLEKTKGKAEVGLIIVNCSLENPTPSLSAMIVNHYKMR 203
SbKCS21  ERSGLGDETSVDFSRFCIP-DRGTEASCEAEELVIFSAVDFKAFARQVNEEDIDAVIACSFVTLVIVNCSLENPTPSLSAMIVNHYKMR 199
SbKCS22  ERSGLGDETYLPEALHCIPPTMMAAREAEAEAVMFGALDLSLEKTKGKAEVGLIIVNCSLENPTPSLSAMIVNHYKMR 200
SbKCS23  ERSGLGQKTYVPEALLRVPPNCSSEARAEAEAVMFGALDLSLEKTKGKAEVGLIIVNCSLENPTPSLSAMIVNHYKMR 200
SbKCS24  ERSGLGDETYLPEALHCIPPTMMAAREAEAEAVMFGALDLSLEKTKGKAEVGLIIVNCSLENPTPSLSAMIVNHYKMR 173
SbKCS25  ERSGLGDETYLPEALHCIPPTMMAAREAEAEAVMFGALDLSLEKTKGKAEVGLIIVNCSLENPTPSLSAMIVNHYKMR 224

```

FAE1\_CUT1\_RppA domain

\*            260            \*            280            \*            300            \*            320

```

AtKCS1  EDIKSYNLGGMGCSAGLISIDLAKDLQVHRNTYAVVSTENITLNWYFGNDRSMLIPNCLFRMGAAVLLSNRRQDRKR 314
AtKCS2  GNVLSYNLGGMGCSAGLISIDLAKDLQVHRNTYAVVSTENITLNWYFGNDRSMLIPNCLFRMGAAVLLSNRRSDRCR 304
AtKCS3  EDIKVFNLTAGMGCASGLIIDLAKDLQVHRNTYAVVSTENITLNWYFGNDRSMLIPNCLFRMGAAVLLSNRRSLSRR 231
AtKCS4  GNIRSYNLGGMGCSAGLISIDLAKDLQVHRNTYAVVSTENITLNWYFGNDRSMLIPNCLFRMGAAVLLSNRRSDRCR 309
AtKCS5  SNIKSYNLGGMGCSAGLISIDLAKDLQVHRNTYAVVSTENITLNWYFGNDRSMLIPNCLFRMGAAVLLSNRRSDRCR 287
AtKCS6  SNIKSYNLGGMGCSAGLISIDLAKDLQVHRNTYAVVSTENITLNWYFGNDRSMLIPNCLFRMGAAVLLSNRRSDRCR 292
AtKCS7  SDIKSYNLGGMGCSAGLISIDLAKDLQVHRNTYAVVSTENITLNWYFGNDRSMLIPNCLFRMGAAVLLSNRRQDSHK 250
AtKCS8  DNIKSYNLGGMGCSAGLISIDLAKDLQVHRNTYAVVSTENITLNWYFGNDRSMLIPNCLFRMGAAVLLSNRRSDRCR 271
AtKCS9  GNVKSYNLGGMGCSAGLISIDLAKDLQVHRNTYAVVSTENITLNWYFGNDRSMLIPNCLFRMGAAVLLSNRRQDRKR 309
AtKCS10  GNILSYNLGGMGCSAGLISIDLAKDLQVHRNTYAVVSTENITLNWYFGNDRSMLIPNCLFRMGAAVLLSNRRDFRH 317
AtKCS11  GNILSYNLGGMGCSAGLISIDLAKDLQVHRNTYAVVSTENITLNWYFGNDRSMLIPNCLFRMGAAVLLSNRRWDRRH 300
AtKCS12  TDVKVFNLTAGMGCASGLIIDLAKDLQVHRNTYAVVSTENITLNWYFGNDRSMLIPNCLFRMGAAVLLSNRRSLSRR 231
AtKCS13  TDVKVFNLTAGMGCASGLIIDLAKDLQVHRNTYAVVSTENITLNWYFGNDRSMLIPNCLFRMGAAVLLSNRRSLSRR 263
AtKCS14  TDVKVFNLTAGMGCASGLIIDLAKDLQVHRNTYAVVSTENITLNWYFGNDRSMLIPNCLFRMGAAVLLSNRRSLSRR 256
AtKCS15  HNIKSYNLGGMGCSAGLISIDLAKDLQVHRNTYAVVSTENITLNWYFGNDRSMLIPNCLFRMGAAVLLSNRRIDRCR 283
AtKCS16  DNIKSYNLGGMGCSAGLISIDLAKDLQVHRNTYAVVSTENITLNWYFGNDRSMLIPNCLFRMGAAVLLSNRRIDRCR 281
AtKCS17  GNIKSYNLGGMGCSAGLISIDLAKDLQVHRNTYAVVSTENITLNWYFGNDRSMLIPNCLFRMGAAVLLSNRRPDRKR 285
AtKCS18  SNIKSYNLGGMGCSAGLISIDLAKDLQVHRNTYAVVSTENITLNWYFGNDRSMLIPNCLFRMGAAVLLSNRRSDRCR 280
AtKCS19  EDIKSYNLGGMGCSAGLISIDLAKDLQVHRNTYAVVSTENITLNWYFGNDRSMLIPNCLFRMGAAVLLSNRRREARR 289
AtKCS20  GNVLSYNLGGMGCSAGLISIDLAKDLQVHRNTYAVVSTENITLNWYFGNDRSMLIPNCLFRMGAAVLLSNRRDFRH 318
AtKCS21  GNVLSYNLGGMGCSAGLISIDLAKDLQVHRNTYAVVSTENITLNWYFGNDRSMLIPNCLFRMGAAVLLSNRRSDRCR 301
AtKCS22  PDVKSYNLGGMGCSAGLISIDLAKDLQVHRNTYAVVSTENITLNWYFGNDRSMLIPNCLFRMGAAVLLSNRRVDRAD 248
SbKCS10  ADVRETNLGMGCAGLISIDLAKDLQVHRNTYAVVSTENITLNWYFGNDRSMLIPNCLFRMGAAVLLSNRRADAGR 267
SbKCS11  PDVKSYNLGGMGCSAGLISIDLAKDLQVHRNTYAVVSTENITLNWYFGNDRSMLIPNCLFRMGAAVLLSNRRSP---ER 279
SbKCS12  ADVQVNLGGMGCSAGLISIDLAKDLQVHRNTYAVVSTENITLNWYFGNDRSMLIPNCLFRMGAAVLLSNRRSP---ER 274
SbKCS13  GNVLSYNLGGMGCSAGLISIDLAKDLQVHRNTYAVVSTENITLNWYFGNDRSMLIPNCLFRMGAAVLLSNRRSDRCR 308
SbKCS14  GNVSYNLGMGCASGLISIDLAKDLQVHRNTYAVVSTENITLNWYFGNDRSMLIPNCLFRMGAAVLLSNRRSDRCR 305
SbKCS15  GNVSYNLGMGCASGLISIDLAKDLQVHRNTYAVVSTENITLNWYFGNDRSMLIPNCLFRMGAAVLLSNRRSDRCR 300
SbKCS16  DDVQVNLGGMGCSAGLISIDLAKDLQVHRNTYAVVSTENITLNWYFGNDRSMLIPNCLFRMGAAVLLSNRRDFRH 189
SbKCS17  ADVQVNLGGMGCSAGLISIDLAKDLQVHRNTYAVVSTENITLNWYFGNDRSMLIPNCLFRMGAAVLLSNRRSP---ER 257
SbKCS18  GNIRSYNLGGMGCSAGLISIDLAKDLQVHRNTYAVVSTENITLNWYFGNDRSMLIPNCLFRMGAAVLLSNRRADRCR 308
SbKCS19  GNIASYNLGMGCASGLISIDLAKDLQVHRNTYAVVSTENITLNWYFGNDRSMLIPNCLFRMGAAVLLSNRRSARRR 300
SbKCS20  SDVRVNLGGMGCSAGLISIDLAKDLQVHRNTYAVVSTENITLNWYFGNDRSMLIPNCLFRMGAAVLLSNRRSP---DK 280
SbKCS21  SGRVSNLGMGCASGLISIDLAKDLQVHRNTYAVVSTENITLNWYFGNDRSMLIPNCLFRMGAAVLLSNRRSKN---NK 278
SbKCS22  STHHVNLMGMCASGLISIDLAKDLQVHRNTYAVVSTENITLNWYFGNDRSMLIPNCLFRMGAAVLLSNRRSP---DM 277
SbKCS23  GDVRNHLGMGCASGLISIDLAKDLQVHRNTYAVVSTENITLNWYFGNDRSMLIPNCLFRMGAAVLLSNRRSP---SM 277
SbKCS24  RDQVNLGMGCASGLISIDLAKDLQVHRNTYAVVSTENITLNWYFGNDRSMLIPNCLFRMGAAVLLSNRRSP---AN 250
SbKCS25  GNVLSYNLGGMGCSAGLISIDLAKDLQVHRNTYAVVSTENITLNWYFGNDRSMLIPNCLFRMGAAVLLSNRRSDRCR 304

```

|         | * 340                                                                                | * 360 | * 380 | * 400 |  |
|---------|--------------------------------------------------------------------------------------|-------|-------|-------|--|
| AtKCS1  | SKYSLVNVVRRHKGSDKNNNOVYQKEDERTTIGVSLARELMSVAGDALKTNITTLGPMVLPSEOLMELISLVKRRMFK       | 394   |       |       |  |
| AtKCS2  | SKYQIHTVRRHKGSDENANNOVYQREDNNKQIGVSLKLNLMALAGEALKTNITTLGFLVLPSEOLLEFATLVARKVFN       | 384   |       |       |  |
| AtKCS3  | AMFKRCLVRRHHGAREDSNACVQKEDDELHICVHDKTLPKAATRAFDINLKVITPKILPVTELRMMLCLLKK--KL         | 309   |       |       |  |
| AtKCS4  | SKYRVHVVRRHKGADKARNOVYQEDDTRTEVSLSKDLMALAGETLTKNITTLGFLVLPSEOLLEFMTLVVKKLNF          | 389   |       |       |  |
| AtKCS5  | AKYKICHLVRRHKGADKSNVVMQDDKNGVGINLSKDLMTIAGEALKANITTLGFLVLPSEOLLELSLGRKIFN            | 367   |       |       |  |
| AtKCS6  | AKYKSHLVRHKGADKSSYVYQEDDEKHNHVGGINLSKDLMALAGEALKANITTLGFLVLPSEOLLELTSLGRKIFN         | 372   |       |       |  |
| AtKCS7  | AKYKQHLVRRHKGSDTESVEMVQVDEEKVGVALLSKDLVRSKALKINVVQLGPRVLPSEOLKIIISFQOR---K           | 327   |       |       |  |
| AtKCS8  | AKYEVVHTVRRHKGSDRSSEVATQEDDEEILGVTLTKNLPVARTLKNITATLGLVLPSEOLLEKFAFIFVKKYFK          | 351   |       |       |  |
| AtKCS9  | SKYKLVHTVRRHKGAVEKAGNOVYQEDDNEKTKVSLSKDLMALAGEALKANITTLGFLVLPSEOLLEFMTLVTKKLFN       | 389   |       |       |  |
| AtKCS10 | AKYREHIVRRHKGADRSRSVYQEDDEQCFKHKISRLDMEVCGEALKTNITTLGFLVLPSEOLLEFAALTRRTFSP          | 397   |       |       |  |
| AtKCS11 | SKYEVVTVRRHKGADKRCGCIQEDDSASKIEMTLSEKDLMAVAGDALKTNITTLGFLVLPSEOLLEFATLVGRKLFK        | 380   |       |       |  |
| AtKCS12 | AMFKKCMVRRHHGAREESNCCIQAEDDQRFVYKCNLPKAATRAFVENLKVITPKILPVTELRMMLKLLIKKIKI           | 311   |       |       |  |
| AtKCS13 | SKYEVHTVRRHKGSSKHTQAEKEDSKIVGVALSKDLTVVAGDSLTKNLTALGFLVLPSEOLLELFLVKSRLFR            | 343   |       |       |  |
| AtKCS14 | SKYEVHTVRRHKGSSKHTQAEKEDSKIVGVALSKDLTVVAGDTLTKNLTALGFLVLPSEOLLELFLVKSRLFR            | 336   |       |       |  |
| AtKCS15 | AKYQMQVLRHKGMEITSSKSTELREDRDKQGLYVSKDLVMEVGRHALKANITATLGRLEP-----                    | 344   |       |       |  |
| AtKCS16 | AKYEVVHTVRRHKGADRSSEVATQEDDEEILGVTLTKNLPVARTLKNITATLGLVLPSEOLLEKFAFIFVKKYFK          | 361   |       |       |  |
| AtKCS17 | SKYKLVHTVRRHKGSDENANNOVYQEDDECLTKVSLSKDLMALAGEALKTNITSLGFLVLPSEOLLEFATVAKRIFN        | 365   |       |       |  |
| AtKCS18 | SKYKLVHTVRRHKGADKRSRVOQEDDESEKICNLSKDLITNVAGTHTKNIATLGLVLPSEOLLEKFAFIFVAKRLLK        | 369   |       |       |  |
| AtKCS19 | ALMKLVTVRRHKGADDEANSCICIMEDRDGHPFLTRYLKKAARALTKNLQVLEHRLVVKELTRAIVRALK----           | 309   |       |       |  |
| AtKCS20 | SKYQIHTVRRHKGADNAGNOVYQREDNTEKIGVSLKLNLMALAGEALKTNITTLGFLVLPSEOLLEFATLVARKVFK        | 391   |       |       |  |
| AtKCS21 | AKYEVHVVRRHKGADKRAKRCVYQEDDSDKQMSITKDVISVAGDMLKMLTSLGFLVLPSEOLLEKFAFIFVQIHLCKKLLK    | 334   |       |       |  |
| SbKCS1  | AKLRRHVRRHKGADSEANALQMEDDARPCFHLGRELPRAAVHAFIHNLRVLAQKVLPLPELRLTCATFSARL--           | 311   |       |       |  |
| SbKCS2  | AKYQIHTVRRHKGADKRSRVOQEDDEECVGVSLSKDLMAVAGEALRNTITTLGFLVLPSEOLLELRAATVLRNRFVFR       | 317   |       |       |  |
| SbKCS3  | AKYRLLHTVRRHKGADDEANSCVYQEDDGAESVGVSLSKDLMAVAGDALKTNITTLGFLVLPSEOLLEKLSLVRVLR        | 393   |       |       |  |
| SbKCS4  | AKMEKRCVRAHIGASDAHAALQREDGSRVCSLSPALPKAVRAFAVLRRLARVRLVVAELARLARHARRLFF              | 310   |       |       |  |
| SbKCS5  | AKYRLLHTVRRHKGADDEANNOVYQREDDEKVGVSARELMAVAGDALKTNITTLGFLVLPSEOLLEKLSLVMRRVFR        | 394   |       |       |  |
| SbKCS6  | AKYRLLHTVRRHKGADKRAKRCVYQEDDQCFKHKISRLDMEVCGEALKTNITTLGFLVLPSEOLLEFFRLVGRKLFN        | 369   |       |       |  |
| SbKCS7  | AKYQIHTVRRHKGADKRAKRCVYQEDDQCFKHKISRLDMEVCGEALKTNITTLGFLVLPSEOLLEFAGVLRFRHIFP        | 398   |       |       |  |
| SbKCS8  | AKYRLLHTVRRHKGADDEANNOVYQEDDGAESVGVSLSKDLMAVAGDALKTNITTLGFLVLPSEOLLELRAALLRRAA-      | 380   |       |       |  |
| SbKCS9  | AKYEVVHTVRRHKGSDAANNAALQMEDDEENLGVALLKDLVRSVAGAAARRHTALGPRVLPSEOLLEKFAFIFVARRVARY--- | 325   |       |       |  |
| SbKCS10 | VKYREASLTVRRHKGADKRAKRCVYQEDDQCFKHKISRLDMEVCGEALKTNITTLGFLVLPSEOLLELRAATVLRNRFVFR    | 347   |       |       |  |
| SbKCS11 | ARFRGRVRRHKGADKRAKRCVYQEDDQCFKHKISRLDMEVCGEALKTNITTLGFLVLPSEOLLELRAATVLRNRFVFR       | 359   |       |       |  |
| SbKCS12 | ARFRGRVRRHKGADKRAKRCVYQEDDQCFKHKISRLDMEVCGEALKTNITTLGFLVLPSEOLLELRAATVLRNRFVFR       | 354   |       |       |  |
| SbKCS13 | AKYEVVHTVRRHKGADKRAKRCVYQEDDQCFKHKISRLDMEVCGEALKTNITTLGFLVLPSEOLLELRAATVLRNRFVFR     | 388   |       |       |  |
| SbKCS14 | SKYKLVHTVRRHKGADKRAKRCVYQEDDQCFKHKISRLDMEVCGEALKTNITTLGFLVLPSEOLLELRAATVLRNRFVFR     | 385   |       |       |  |
| SbKCS15 | AKYQIHTVRRHKGADKRAKRCVYQEDDQCFKHKISRLDMEVCGEALKTNITTLGFLVLPSEOLLELRAATVLRNRFVFR      | 380   |       |       |  |
| SbKCS16 | ARFRGRVRRHKGADKRAKRCVYQEDDQCFKHKISRLDMEVCGEALKTNITTLGFLVLPSEOLLELRAATVLRNRFVFR       | 269   |       |       |  |
| SbKCS17 | ARFRGRVRRHKGADKRAKRCVYQEDDQCFKHKISRLDMEVCGEALKTNITTLGFLVLPSEOLLELRAATVLRNRFVFR       | 337   |       |       |  |
| SbKCS18 | AKYRLLHTVRRHKGADKRAKRCVYQEDDQCFKHKISRLDMEVCGEALKTNITTLGFLVLPSEOLLELRAATVLRNRFVFR     | 388   |       |       |  |
| SbKCS19 | SKYQIHTVRRHKGADKRAKRCVYQEDDQCFKHKISRLDMEVCGEALKTNITTLGFLVLPSEOLLELRAATVLRNRFVFR      | 380   |       |       |  |
| SbKCS20 | ARFRGRVRRHKGADKRAKRCVYQEDDQCFKHKISRLDMEVCGEALKTNITTLGFLVLPSEOLLELRAATVLRNRFVFR       | 360   |       |       |  |
| SbKCS21 | ARFRGRVRRHKGADKRAKRCVYQEDDQCFKHKISRLDMEVCGEALKTNITTLGFLVLPSEOLLELRAATVLRNRFVFR       | 357   |       |       |  |
| SbKCS22 | ARFRGRVRRHKGADKRAKRCVYQEDDQCFKHKISRLDMEVCGEALKTNITTLGFLVLPSEOLLELRAATVLRNRFVFR       | 357   |       |       |  |
| SbKCS23 | SRFKMHTVRRHKGADKRAKRCVYQEDDQCFKHKISRLDMEVCGEALKTNITTLGFLVLPSEOLLELRAATVLRNRFVFR      | 357   |       |       |  |
| SbKCS24 | AKYQIHTVRRHKGADKRAKRCVYQEDDQCFKHKISRLDMEVCGEALKTNITTLGFLVLPSEOLLELRAATVLRNRFVFR      | 330   |       |       |  |
| SbKCS25 | SKYEVHTVRRHKGADKRCGCIQEDDSASKIEMTLSEKDLMAVAGDALKTNITTLGFLVLPSEOLLELRAATVLRNRFVFR     | 384   |       |       |  |

|         | * 420                                                                               | * 440 | * 460 | * 480 |  |
|---------|-------------------------------------------------------------------------------------|-------|-------|-------|--|
| AtKCS1  | LK---VKPVIIPDFKLAFFHFCIHAGGRAVLDELOKNEQLKDWHEPSSRMTLHRFGNTSSSSLYWELAYEAKGRVKAQDR    | 471   |       |       |  |
| AtKCS2  | VKK---IKPVIIPDFKLAFFHFCIHAGGRAVLDELOKNEQLKDWHEPSSRMTLHRFGNTSSSSLYWELAYEAKGRVKAQDR   | 462   |       |       |  |
| AtKCS3  | RSSKAGVKAGINFKTGIDHFCIHAGGRAVLDELOKNEQLKDWHEPSSRMTLHRFGNTSSSSLYWELAYEAKGRVKAQDR     | 389   |       |       |  |
| AtKCS4  | ---GKVPVIIPDFKLAFFHFCIHAGGRAVLDELOKNEQLKDWHEPSSRMTLHRFGNTSSSSLYWELAYEAKGRVKAQDR     | 466   |       |       |  |
| AtKCS5  | ---PKWVPVIIPDFKLAFFHFCIHAGGRAVLDELOKNEQLKDWHEPSSRMTLHRFGNTSSSSLYWELAYEAKGRVKAQDR    | 444   |       |       |  |
| AtKCS6  | ---PKWVPVIIPDFKLAFFHFCIHAGGRAVLDELOKNEQLKDWHEPSSRMTLHRFGNTSSSSLYWELAYEAKGRVKAQDR    | 449   |       |       |  |
| AtKCS7  | WGM---KELVIIPDFKLAFFHFCIHAGGRAVLDELOKNEQLKDWHEPSSRMTLHRFGNTSSSSLYWELAYEAKGRVKAQDR   | 405   |       |       |  |
| AtKCS8  | P---ELRN---YIPDFKLAFFHFCIHAGGRAVLDELOKNEQLKDWHEPSSRMTLHRFGNTSSSSLYWELAYEAKGRVKAQDR  | 428   |       |       |  |
| AtKCS9  | ---SKLVPVIIPDFKLAFFHFCIHAGGRAVLDELOKNEQLKDWHEPSSRMTLHRFGNTSSSSLYWELAYEAKGRVKAQDR    | 466   |       |       |  |
| AtKCS10 | AAKDLKSPYIPDYFLAFHFCIHAGGRAVLDELOKNEQLKDWHEPSSRMTLHRFGNTSSSSLYWELAYEAKGRVKAQDR      | 477   |       |       |  |
| AtKCS11 | MK---IKPVIIPDFKLAFFHFCIHAGGRAVLDELOKNEQLKDWHEPSSRMTLHRFGNTSSSSLYWELAYEAKGRVKAQDR    | 457   |       |       |  |
| AtKCS12 | RQN---LKAGINFKTGIDHFCIHAGGRAVLDELOKNEQLKDWHEPSSRMTLHRFGNTSSSSLYWELAYEAKGRVKAQDR     | 388   |       |       |  |
| AtKCS13 | LK---VSPVVPDFKLAFFHFCIHAGGRAVLDELOKNEQLKDWHEPSSRMTLHRFGNTSSSSLYWELAYEAKGRVKAQDR     | 420   |       |       |  |
| AtKCS14 | LK---VSPVVPDFKLAFFHFCIHAGGRAVLDELOKNEQLKDWHEPSSRMTLHRFGNTSSSSLYWELAYEAKGRVKAQDR     | 413   |       |       |  |
| AtKCS15 | ---SEFHLKLAASSKRVLDDIHKDLKTEENMPSRMTLHRFGNTSSSSLYWELAYEAKGRVKAQDR                   | 409   |       |       |  |
| AtKCS16 | P---KLKH---YIPDFKLAFFHFCIHAGGRAVLDELOKNEQLKDWHEPSSRMTLHRFGNTSSSSLYWELAYEAKGRVKAQDR  | 438   |       |       |  |
| AtKCS17 | D---KKKVPVIIPDFKLAFFHFCIHAGGRAVLDELOKNEQLKDWHEPSSRMTLHRFGNTSSSSLYWELAYEAKGRVKAQDR   | 443   |       |       |  |
| AtKCS18 | D---KIKHYVVPDFKLAFFHFCIHAGGRAVLDELOKNEQLKDWHEPSSRMTLHRFGNTSSSSLYWELAYEAKGRVKAQDR    | 438   |       |       |  |
| AtKCS19 | RT----GIGNLATGLCHFCIHAGGRAVLDELOKNEQLKDWHEPSSRMTLHRFGNTSSSSLYWELAYEAKGRVKAQDR       | 385   |       |       |  |
| AtKCS20 | VKK---IKPVIIPDFKLAFFHFCIHAGGRAVLDELOKNEQLKDWHEPSSRMTLHRFGNTSSSSLYWELAYEAKGRVKAQDR   | 469   |       |       |  |
| AtKCS21 | IYE---NSSVTPNFHTAFHFCIHAGGRAVLDELOKNEQLKDWHEPSSRMTLHRFGNTSSSSLYWELAYEAKGRVKAQDR     | 412   |       |       |  |
| SbKCS1  | ---SN---HLTIRMKAGVDFHFCIHAGGRAVLDELOKNEQLKDWHEPSSRMTLHRFGNTSSSSLYWELAYEAKGRVKAQDR   | 386   |       |       |  |
| SbKCS2  | AM---VRAVLPDFKLAFFHFCIHAGGRAVLDELOKNEQLKDWHEPSSRMTLHRFGNTSSSSLYWELAYEAKGRVKAQDR     | 394   |       |       |  |
| SbKCS3  | SRG---VRPVIIPDFKLAFFHFCIHAGGRAVLDELOKNEQLKDWHEPSSRMTLHRFGNTSSSSLYWELAYEAKGRVKAQDR   | 471   |       |       |  |
| SbKCS4  | QFPGGDAAAKINFKAGVDFHFCIHAGGRAVLDELOKNEQLKDWHEPSSRMTLHRFGNTSSSSLYWELAYEAKGRVKAQDR    | 390   |       |       |  |
| SbKCS5  | VKG---VRPVIIPDFKLAFFHFCIHAGGRAVLDELOKNEQLKDWHEPSSRMTLHRFGNTSSSSLYWELAYEAKGRVKAQDR   | 472   |       |       |  |
| SbKCS6  | ---KAWKVPVIIPDFKLAFFHFCIHAGGRAVLDELOKNEQLKDWHEPSSRMTLHRFGNTSSSSLYWELAYEAKGRVKAQDR   | 446   |       |       |  |
| SbKCS7  | ---SK---AAPVIIPDFKLAFFHFCIHAGGRAVLDELOKNEQLKDWHEPSSRMTLHRFGNTSSSSLYWELAYEAKGRVKAQDR | 475   |       |       |  |
| SbKCS8  | VK---VKPVIIPDFKLAFFHFCIHAGGRAVLDELOKNEQLKDWHEPSSRMTLHRFGNTSSSSLYWELAYEAKGRVKAQDR    | 457   |       |       |  |
| SbKCS9  | ---KAAAAPVDPDFKLAFFHFCIHAGGRAVLDELOKNEQLKDWHEPSSRMTLHRFGNTSSSSLYWELAYEAKGRVKAQDR    | 402   |       |       |  |
| SbKCS10 | DNN-TAVPPLPDFKLAFFHFCIHAGGRAVLDELOKNEQLKDWHEPSSRMTLHRFGNTSSSSLYWELAYEAKGRVKAQDR     | 426   |       |       |  |
| SbKCS11 | CWG-KVRLVRRPDFKLAFFHFCIHAGGRAVLDELOKNEQLKDWHEPSSRMTLHRFGNTSSSSLYWELAYEAKGRVKAQDR    | 438   |       |       |  |
| SbKCS12 | GR---KVRLVRRPDFKLAFFHFCIHAGGRAVLDELOKNEQLKDWHEPSSRMTLHRFGNTSSSSLYWELAYEAKGRVKAQDR   | 432   |       |       |  |
| SbKCS13 | MKG---VKPVIIPDFKLAFFHFCIHAGGRAVLDELOKNEQLKDWHEPSSRMTLHRFGNTSSSSLYWELAYEAKGRVKAQDR   | 466   |       |       |  |
| SbKCS14 | VRG---LRPVIIPDFKLAFFHFCIHAGGRAVLDELOKNEQLKDWHEPSSRMTLHRFGNTSSSSLYWELAYEAKGRVKAQDR   | 463   |       |       |  |
| SbKCS15 | VQSSRSRPVIIPDLTAFHFCIHAGGRAVLDELOKNEQLKDWHEPSSRMTLHRFGNTSSSSLYWELAYEAKGRVKAQDR      | 460   |       |       |  |
| SbKCS16 | AG---TTKPYRPAKGVDFHFCIHAGGRAVLDELOKNEQLKDWHEPSSRMTLHRFGNTSSSSLYWELAYEAKGRVKAQDR     | 347   |       |       |  |
| SbKCS17 | AG---TTKPYRPAKGVDFHFCIHAGGRAVLDELOKNEQLKDWHEPSSRMTLHRFGNTSSSSLYWELAYEAKGRVKAQDR     | 415   |       |       |  |
| SbKCS18 | ---AKMKVPVIIPDFKLAFFHFCIHAGGRAVLDELOKNEQLKDWHEPSSRMTLHRFGNTSSSSLYWELAYEAKGRVKAQDR   | 465   |       |       |  |
| SbKCS19 | RK---VKPVIIPDFKLAFFHFCIHAGGRAVLDELOKNEQLKDWHEPSSRMTLHRFGNTSSSSLYWELAYEAKGRVKAQDR    | 457   |       |       |  |
| SbKCS20 | GR---FKPVIIPDFKLAFFHFCIHAGGRAVLDELOKNEQLKDWHEPSSRMTLHRFGNTSSSSLYWELAYEAKGRVKAQDR    | 437   |       |       |  |
| SbKCS21 | GKE---VPLVVPDFKLAFFHFCIHAGGRAVLDELOKNEQLKDWHEPSSRMTLHRFGNTSSSSLYWELAYEAKGRVKAQDR    | 427   |       |       |  |
| SbKCS22 | GR---VKLVIIPDFKLAFFHFCIHAGGRAVLDELOKNEQLKDWHEPSSRMTLHRFGNTSSSSLYWELAYEAKGRVKAQDR    | 434   |       |       |  |
| SbKCS23 | KR---IKLVIIPDFKLAFFHFCIHAGGRAVLDELOKNEQLKDWHEPSSRMTLHRFGNTSSSSLYWELAYEAKGRVKAQDR    | 434   |       |       |  |
| SbKCS24 | KKS---SWQVVKFGLAFHFCIHAGGRAVLDELOKNEQLKDWHEPSSRMTLHRFGNTSSSSLYWELAYEAKGRVKAQDR      | 408   |       |       |  |
| SbKCS25 | MK---IKPVIIPDFKLAFFHFCIHAGGRAVLDELOKNEQLKDWHEPSSRMTLHRFGNTSSSSLYWELAYEAKGRVKAQDR    | 461   |       |       |  |

ACP\_syn\_III\_C domain

```

*      500      *      520      *
AtKCS1 LWQIAFGSGGFKCNSAVKALRPVSTTEEMTNATAGSDQYEVKVVQ----- : 516
AtKCS2 TWQIAFGSGGFKCNSAVWRALRTID-PSKENPVIDEHEFEVVPVPRTPVTSSSESER : 517
AtKCS3 VVMISFGAGGFKCNSCVWEVVRDLNVGEA-NVNHCIHQYEPKS-ILNPFPEKYGWI : 443
AtKCS4 VWQIAFGSGGFKCNSAWEALRHVK-PSNNSPEWDCIDKYEVVTLISY----- : 510
AtKCS5 VWQIAFGSGGFKCNSAVWKNRTIK-TPTDGAISDCHERYEVFVPEVVKL----- : 492
AtKCS6 VWQIAFGSGGFKCNSAVWKNRTIK-TPKDGWISDCHERYEVFVPEVVKL----- : 497
AtKCS7 VWQIAFGSGGFKCNSAVWKNRTIK-TPKDGWISDCHERYEVFVPEVVKL----- : 459
AtKCS8 IWQIALGSGGFKCNSVWVALRDVK-PSANSPEWDCIDRYEVEIDI----- : 472
AtKCS9 VWQIAFGSGGFKCNSVWVALRNVK-PSVSSPEWDCIDRYEVEIDF----- : 510
AtKCS10 VWQIAFGSGGFKCNSVWVALRNVK-PSVSSPEWDCIDRYEVEIDF----- : 520
AtKCS11 IWQIAFGSGGFKCNSVWVALRNVK-PSVSSPEWDCIDRYEVEIDF----- : 505
AtKCS12 VVMISFGAGGFKCNSCVWEVVRDLTGGES-NVNHCIHQYEPKS-ILNPFPEKYGWI : 442
AtKCS13 VWQIAFGSGGFKCNSVWVALRNVK-PSVSSPEWDCIDRYEVEIDF----- : 464
AtKCS14 VWQIAFGSGGFKCNSVWVALRNVK-PSVSSPEWDCIDRYEVEIDF----- : 457
AtKCS15 VWQIAFGSGGFKCNSVWVALRNVK-PSVSSPEWDCIDRYEVEIDF----- : 443
AtKCS16 IWQIALGSGGFKCNSVWVALRNVK-PSVSSPEWDCIDRYEVEIDF----- : 486
AtKCS17 VWQIAFGSGGFKCNSVWVALRNVK-PSVSSPEWDCIDRYEVEIDF----- : 487
AtKCS18 AWQIALGSGGFKCNSVWVALRNVK-ASANSPEWDCIDRYEVEIDF----- : 493
AtKCS19 ILMVSMAGGFKCNSVWVALRNVK-ASANSPEWDCIDRYEVEIDF----- : 436
AtKCS20 TWQIAFGSGGFKCNSAVWVALRNVK-ASANSPEWDCIDRYEVEIDF----- : 520
AtKCS21 IWQIAFGSGGFKCNSVWVALRNVK-ASANSPEWDCIDRYEVEIDF----- : 463
SbKCS1 ILMVTFGAGGFKCNSCVWEVVRDLTGGES-NVNHCIHQYEPKS-ILNPFPEKYGWI : 436
SbKCS2 VWQIAFGSGGFKCNSAVWVALRNVK-ASANSPEWDCIDRYEVEIDF----- : 448
SbKCS3 VWQIAFGSGGFKCNSAVWVALRNVK-ASANSPEWDCIDRYEVEIDF----- : 516
SbKCS4 ILMVTFGAGGFKCNSCVWEVVRDLTGGES-NVNHCIHQYEPKS-ILNPFPEKYGWI : 440
SbKCS5 VWQIAFGSGGFKCNSAVWVALRNVK-ASANSPEWDCIDRYEVEIDF----- : 517
SbKCS6 VWQIAFGSGGFKCNSAVWVALRNVK-ASANSPEWDCIDRYEVEIDF----- : 494
SbKCS7 VWQIAFGSGGFKCNSAVWVALRNVK-ASANSPEWDCIDRYEVEIDF----- : 519
SbKCS8 VWQIAFGSGGFKCNSAVWVALRNVK-ASANSPEWDCIDRYEVEIDF----- : 512
SbKCS9 ILMVTFGAGGFKCNSCVWEVVRDLTGGES-NVNHCIHQYEPKS-ILNPFPEKYGWI : 452
SbKCS10 VWQIAFGSGGFKCNSAVWVALRNVK-ASANSPEWDCIDRYEVEIDF----- : 470
SbKCS11 VVMISFGAGGFKCNSCVWEVVRDLTGGES-NVNHCIHQYEPKS-ILNPFPEKYGWI : 488
SbKCS12 ILMVTFGAGGFKCNSCVWEVVRDLTGGES-NVNHCIHQYEPKS-ILNPFPEKYGWI : 484
SbKCS13 VWQIAFGSGGFKCNSAVWVALRNVK-ASANSPEWDCIDRYEVEIDF----- : 517
SbKCS14 AWQIAFGSGGFKCNSAVWVALRNVK-ASANSPEWDCIDRYEVEIDF----- : 514
SbKCS15 VWQIAFGSGGFKCNSAVWVALRNVK-ASANSPEWDCIDRYEVEIDF----- : 515
SbKCS16 LCMISFSGIDCSVWVALRNVK-ASANSPEWDCIDRYEVEIDF----- : 396
SbKCS17 LCMISFSGIDCSVWVALRNVK-ASANSPEWDCIDRYEVEIDF----- : 464
SbKCS18 IWQIAFGSGGFKCNSVWVALRNVK-ASANSPEWDCIDRYEVEIDF----- : 518
SbKCS19 TWQIAFGSGGFKCNSAVWVALRNVK-ASANSPEWDCIDRYEVEIDF----- : 505
SbKCS20 VVMISFGAGGFKCNSCVWEVVRDLTGGES-NVNHCIHQYEPKS-ILNPFPEKYGWI : 484
SbKCS21 -----VYPTIPQC----- : 435
SbKCS22 VVMISFGAGGFKCNSCVWEVVRDLTGGES-NVNHCIHQYEPKS-ILNPFPEKYGWI : 476
SbKCS23 ILMVTFGAGGFKCNSCVWEVVRDLTGGES-NVNHCIHQYEPKS-ILNPFPEKYGWI : 474
SbKCS24 VVMISFGAGGFKCNSCVWEVVRDLTGGES-NVNHCIHQYEPKS-ILNPFPEKYGWI : 453
SbKCS25 IWQIAFGSGGFKCNSVWVALRNVK-ASANSPEWDCIDRYEVEIDF----- : 512

```
