# Supplementary material for: Genome-wide identification and characterization of the KCS gene family in sorghum (Sorghum bicolor (L.) Moench)
Source: PeerJ. 2022 Oct 7;10:e14156. doi: 10.7717/peerj.14156 (PMC9549899; doi:10.7717/peerj.14156)
Supplement: Table S1 [file peerj-10-14156-s001.xlsx]

## Sheet: Sheet1
Table S1 Primers of qRT-PCR for SbKCS genes
Gene name	Forward primer	Reverse primer
Actin1	GTGCGACGTGGATATTAGG	GGAGCCAAGGCAGTGATT
SbKCS1	CGTCGTCAACGTGTCCAT	GTCATCACCAGAGCCACC
SbKCS3	GCTACAAGATGCGGGAGGAC	CGCCCATGCGGAAGAT
SbKCS6	CTCCGTAGCAACATCCG	ACCAGCCGGTACTTGG
SbKCS7	GCCTTCACCATCTCCG	AGACGCGACTGGAACG
SbKCS8	TGCTCGTCAACCGCTAC	CCCAGGTAGGCGTTCA
SbKCS14	GTGCTGGCAAAGACCG	CAGTACCAGTTCAGCGTGA
SbKCS16	CCTGCTGCCGCTATGCT	ACCCTGTGCCGTGGTTC
SbKCS18	AGCGGGTTCAAGTGCA	GAGGCGGGTTGGGATA
SbKCS21	CTGTCCAAGATAGCCTCC	ATGTCCTCAGCCAACG
