# Supplementary material for: Genome-wide identification and characterization of the KCS gene family in sorghum (Sorghum bicolor (L.) Moench)
Source: PeerJ. 2022 Oct 7;10:e14156. doi: 10.7717/peerj.14156 (PMC9549899; doi:10.7717/peerj.14156)
Supplement: Table S2 [file peerj-10-14156-s002.xlsx]

## Sheet: Sheet1
Table S2 Characterization of the SbKCS genes and SbKCS proteins.
Name	Gene_ID	mRNA_ID	Chr	Start	End	Strand	Length (aa)	MW (Da)	pI
SbKCS1	SORBI_3001G221900	EER94093	1	21041757	21047310	-	466	51767.6	8.98
SbKCS2	SORBI_3001G247700	EER91618	1	26479602	26484784	+	524	56966.2	9.22
SbKCS3	SORBI_3001G264500	EER91722	1	49414202	49415809	+	535	59056.6	9.66
SbKCS4	SORBI_3001G354700	KXG39261	1	64458654	64460075	-	473	51987.1	8.47
SbKCS5	SORBI_3001G438100	KXG39781	1	71631156	71634003	+	549	60617.4	9.18
SbKCS6	SORBI_3001G453200	EER92628	1	72974636	72977039	+	494	55611.2	9.56
SbKCS7	SORBI_3001G482300	EER95395	1	75398361	75402377	-	543	60396.8	9.36
SbKCS8	SORBI_3001G495500	EER95458	1	76491339	76496100	-	529	57400	9.47
SbKCS9	SORBI_3002G179700	EER98791	2	56076887	56078290	-	467	51022.4	9.91
SbKCS10	SORBI_3002G268500	OQU89793	2	65253401	65254861	+	486	53332	9.2
SbKCS11	SORBI_3003G178500	EES00849	3	45640683	45642479	+	494	54897.9	8.24
SbKCS12	SORBI_3003G178700	EES03073	3	45955817	45958108	-	490	54262.3	7.5
SbKCS13	SORBI_3004G086800	EES06493	4	7299823	7302634	-	524	58184.6	8.96
SbKCS14	SORBI_3006G020500	KXG28804	5	64756257	64758690	-	522	57134.2	9.59
SbKCS15	SORBI_3006G020600	EES08876	5	67709463	67711470	+	532	58139.6	9.34
SbKCS16	SORBI_3007G058900	EES10442	6	3524767	3526535	+	459	50669.3	7.52
SbKCS17	SORBI_3007G170400	KXG25841	6	3532500	3534184	-	467	51518.3	7.1
SbKCS18	SORBI_3010G108001	EES19964	9	57487095	57489650	-	520	57712.4	9.6
SbKCS19	SORBI_3010G108100	EES19987	9	57810429	57812688	-	513	57234.8	9.61
SbKCS20	SORBI_3010G108301	EER89559	10	10613918	10615882	-	490	53578.5	8.53
SbKCS21	SORBI_3010G108600	KXG19735	10	10681732	10683507	-	440	48785.3	8.89
SbKCS22	SORBI_3010G181500	EER88189	10	10692185	10693666	+	482	53181.9	8.7
SbKCS23	SORBI_3005G136200	OQU76197	10	10748990	10752863	-	479	53366.6	8.98
SbKCS24	SORBI_3005G164300	EER89567	10	10801407	10803603	-	456	50935.7	8.28
SbKCS25	SORBI_3009G236100	EER88601	10	52071725	52075228	+	516	57951.9	9.25
