# Supplementary material for: Genome-wide identification and characterization of the KCS gene family in sorghum (Sorghum bicolor (L.) Moench)
Source: PeerJ. 2022 Oct 7;10:e14156. doi: 10.7717/peerj.14156 (PMC9549899; doi:10.7717/peerj.14156)
Supplement: Table S3 [file peerj-10-14156-s003.xlsx]

## Sheet: Sheet1
Table S3 The secondary structure statistics of the SbKCS proteins.
Protein	Alpha helix(%)	Extended strand(%)	Beta turn(%)	Random coil (%)
SbKCS1	0.4163	0.1416	0.0751	0.367
SbKCS2	0.4084	0.1641	0.0592	0.3683
SbKCS3	0.4654	0.1402	0.0505	0.3439
SbKCS4	0.4144	0.1438	0.0634	0.3784
SbKCS5	0.4699	0.1457	0.0474	0.337
SbKCS6	0.4858	0.1316	0.0506	0.332
SbKCS7	0.4622	0.1492	0.0516	0.337
SbKCS8	0.4461	0.138	0.0548	0.3611
SbKCS9	0.4283	0.1499	0.0707	0.3512
SbKCS10	0.4691	0.1379	0.0597	0.3333
SbKCS11	0.5	0.1215	0.0506	0.3279
SbKCS12	0.4453	0.1596	0.0631	0.332
SbKCS13	0.4485	0.1412	0.0458	0.3645
SbKCS14	0.4119	0.1628	0.0536	0.3716
SbKCS15	0.4342	0.1617	0.0508	0.3534
SbKCS16	0.4466	0.1481	0.0588	0.3464
SbKCS17	0.4989	0.1199	0.06	0.3212
SbKCS18	0.4635	0.1442	0.0481	0.3442
SbKCS19	0.4327	0.1637	0.0507	0.3528
SbKCS20	0.4306	0.151	0.0612	0.3571
SbKCS21	0.4591	0.1477	0.0591	0.3341
SbKCS22	0.4544	0.1432	0.0539	0.3485
SbKCS23	0.4301	0.1649	0.0689	0.3361
SbKCS24	0.4539	0.1425	0.0526	0.3509
SbKCS25	0.4593	0.1434	0.0446	0.3527
