# Supplementary material for: Genome-wide identification and characterization of the KCS gene family in sorghum (Sorghum bicolor (L.) Moench)
Source: PeerJ. 2022 Oct 7;10:e14156. doi: 10.7717/peerj.14156 (PMC9549899; doi:10.7717/peerj.14156)
Supplement: Table S4 [file peerj-10-14156-s004.xlsx]

## Sheet: Sheet1
The Ct value of qPCR raw data.
	Actin			SbKCS1
	Rep-1	Rep-2	Rep-3	Rep-1	Rep-2	Rep-3
0H CK	26.1245	26.5426	25.5882	33.8646	34.4646	34.5997
6H CK	23.064	22.2273	22.9192	25.5766	24.8943	25.122
6H PEG	23.8609	23.0728	23.3299	25.2405	24.3576	24.2632
6H Salt	24.2984	24.8803	24.6538	27.7877	28.162	28.6366
12H CK	24.1708	24.491	24.4549	27.3666	28.8359	27.9027
12H PEG	26.4144	25.5264	25.4046	28.9622	28.8835	29.5912
12H Salt	24.848	25.1441	25.0022	30.0231	30.2923	30.4741
24H CK	25.5971	24.6431	24.9245	30.177	30.3564	29.9746
24H PEG	26.7175	26.9683	25.9354	31.5683	31.7615	31.2067
24H Salt	24.9776	24.2336	23.2144	31.5665	32.4698	32.0797
	Actin			SbKCS3
	Rep-1	Rep-2	Rep-3	Rep-1	Rep-2	Rep-3
0H CK	26.299	26.8685	25.9583	29.9043	29.8766	28.6089
6H CK	23.3453	22.2076	22.1151	25.4406	25.4488	25.1325
6H PEG	25.3431	25.4339	26.6522	27.3692	27.5585	27.6565
6H Salt	26.2202	25.8647	26.3189	28.0723	28.8333	29.2903
12H CK	26.866	26.618	26.3888	29.3445	28.5415	28.6504
12H PEG	26.6063	25.9197	25.8295	28.9769	28.348	27.8946
12H Salt	26.1216	26.7605	27.2247	29.0197	28.338	29.6166
24H CK	22.0906	22.3574	21.531	24.0538	23.7574	24.3212
24H PEG	25.9582	26.5726	26.8731	30.0451	29.7797	29.794
24H Salt	24.9527	24.4522	23.785	29.6518	28.8812	28.5238
	Actin			SbKCS6
	Rep-1	Rep-2	Rep-3	Rep-1	Rep-2	Rep-3
0H CK	26.299	26.8685	25.9583	29.2058	29.3029	29.3593
6H CK	22.4845	22.495	22.3581	23.9478	22.6218	23.9885
6H PEG	25.3431	25.4339	26.6522	26.9566	27.6189	27.9528
6H Salt	26.2202	25.8647	26.3189	26.6777	26.3284	27.3096
12H CK	24.5448	25.5542	25.2339	26.0745	26.0688	27.2745
12H PEG	26.6063	25.9197	25.8295	26.9212	26.7585	26.7095
12H Salt	26.1216	26.7605	27.2247	28.4363	28.4621	29.6796
24H CK	26.1042	25.2087	25.762	27.918	27.4811	27.7066
24H PEG	25.9582	26.5726	26.8731	28.8566	27.9111	28.1589
24H Salt	24.9776	24.2336	23.2144	28.5169	27.4154	27.1521
	Actin			SbKCS7
	Rep-1	Rep-2	Rep-3	Rep-1	Rep-2	Rep-3
0H CK	26.299	26.8685	25.9583	24.9365	24.8973	23.3214
6H CK	23.9197	23.1887	23.8338	22.4808	23.5548	22.1687
6H PEG	25.3431	25.4339	26.6522	23.315	23.2749	24.1691
6H Salt	23.5279	24.5946	24.5951	22.9634	23.7927	23.9189
12H CK	24.5448	25.5542	25.2339	24.0342	25.2554	24.5982
12H PEG	26.7478	26.115	26.0361	24.4803	23.4398	23.1464
12H Salt	25.8412	26.5334	25.766	24.9648	24.5827	24.7341
24H CK	23.2311	23.1807	22.3802	24.1759	23.267	23.7033
24H PEG	26.5996	26.7274	26.5322	25.4174	24.7935	24.8494
24H Salt	24.6331	23.8313	23.2778	24.6673	23.8299	23.4803
	Actin			SbKCS8
	Rep-1	Rep-2	Rep-3	Rep-1	Rep-2	Rep-3
0H CK	26.3932	26.7822	26.3654	31.6558	30.8717	31.0872
6H CK	23.8893	24.4368	24.5815	27.3108	27.0573	27.8477
6H PEG	26.3388	25.3003	26.8632	30.9687	30.0318	31.0109
6H Salt	25.1111	26.0555	26.2515	30.7304	31.5241	30.7483
12H CK	26.6013	25.0226	25.1619	28.8674	27.0072	27.3357
12H PEG	26.6063	25.9197	25.8295	32.9671	32.8708	32.6867
12H Salt	26.2267	26.143	25.9858	33.5177	33.5695	33.3441
24H CK	23.2264	22.9302	22.367	29.2447	29.4381	28.9752
24H PEG	25.9582	26.5726	26.8731	33.6186	33.9709	33.6037
24H Salt	24.6331	23.8313	23.2778	31.9438	31.5879	30.4231
	Actin			SbKCS14
	Rep-1	Rep-2	Rep-3	Rep-1	Rep-2	Rep-3
0H CK	26.3932	26.7822	26.3654	26.4928	25.9894	25.141
6H CK	24.2526	24.5032	24.3112	24.5531	24.7279	25.2097
6H PEG	26.3388	25.3003	26.8632	25.7119	25.874	25.9485
6H Salt	24.5328	25.814	25.946	23.8907	24.1768	24.2345
12H CK	24.5448	25.5542	25.2339	25.1061	26.1642	25.7549
12H PEG	26.7478	26.115	26.0361	25.7518	24.9891	25.8698
12H Salt	25.8412	26.5334	25.766	25.5299	25.8375	25.5016
24H CK	24.1596	23.3785	23.1347	25.1326	24.0936	24.5832
24H PEG	26.5996	26.7274	26.5322	26.314	25.6402	26.1934
24H Salt	24.9527	24.4522	23.785	25.1503	24.2699	24.2314
	Actin			SbKCS16
	Rep-1	Rep-2	Rep-3	Rep-1	Rep-2	Rep-3
0H CK	25.1393	25.7281	24.809	30.3525	30.7999	29.7778
6H CK	24.2526	24.5032	24.3112	33.4581	33.651	33.1154
6H PEG	25.2886	26.0797	26.6321	32.5011	32.5456	32.7912
6H Salt	23.3913	24.8944	24.9853	32.8268	32.8049	32.6417
12H CK	24.0635	25.1464	24.0858	34.6383	34.2171	33.4704
12H PEG	25.4713	25.0787	25.0287	33.2746	33.2379	32.7282
12H Salt	26.0573	26.736	26.0129	31.6378	31.705	32.2847
24H CK	22.8675	23.2909	23.8348	32.9215	32.8259	31.3752
24H PEG	25.6064	25.8605	25.6587	31.7192	31.5459	31.6136
24H Salt	24.9527	24.4522	23.785	34.2724	34.4429	33.9437
	Actin			SbKCS18
	Rep-1	Rep-2	Rep-3	Rep-1	Rep-2	Rep-3
0H CK	26.3932	26.7822	26.3654	26.6432	26.8199	26.3138
6H CK	24.2526	24.5032	24.3112	24.8347	25.2893	25.6918
6H PEG	26.3388	25.3003	26.8632	27.6499	26.1332	26.9899
6H Salt	24.5328	25.814	25.946	26.5496	26.2743	26.6182
12H CK	24.611	25.1491	24.9194	25.1175	26.2225	25.4973
12H PEG	26.7478	26.115	26.0361	25.347	25.6301	25.3225
12H Salt	25.8412	26.5334	25.766	25.0157	25.477	25.4614
24H CK	23.3433	23.8317	22.8326	23.6703	23.2958	24.4231
24H PEG	26.5996	26.7274	26.5322	25.716	25.8918	25.7739
24H Salt	24.9527	24.4522	23.785	24.3247	23.7746	24.2555
	Actin			SbKCS21
	Rep-1	Rep-2	Rep-3	Rep-1	Rep-2	Rep-3
0H CK	26.2619	26.5667	26.4107	33.4233	33.5721	32.5322
6H CK	24.2526	24.5032	24.3112	33.2161	33.7335	33.2676
6H PEG	24.4475	24.6832	25.8803	33.8605	33.6647	32.7237
6H Salt	24.5328	25.814	25.946	34.5029	34.3999	33.9332
12H CK	25.9287	24.7797	25.735	34.2768	33.8514	34.3458
12H PEG	25.8086	25.3265	25.4453	33.8357	32.9782	32.2638
12H Salt	25.2055	25.0788	25.1237	33.6036	33.3532	33.7456
24H CK	25.7281	24.7009	25.2883	33.4872	32.5956	32.0199
24H PEG	25.9027	26.0433	25.8632	32.282	33.2526	32.896
24H Salt	24.2012	23.8943	23.1278	32.7004	31.4235	32.1272
